# Supplementary material
Source: Springer Nature journal article supplement (https://www.springermedizin.de/resource/supplementary/12931_2013_1420_MOESM2_ESM.pdf/9425958)

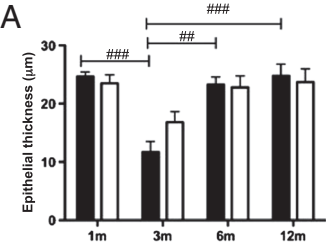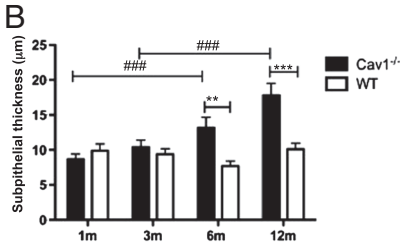

**C**

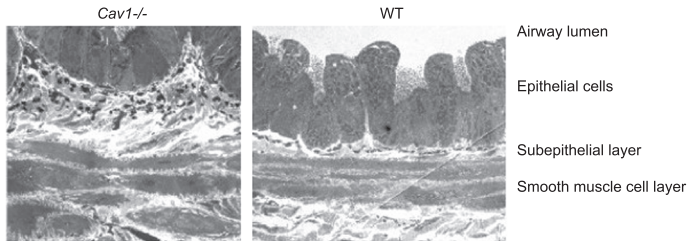

Supplement: MOESM2 [file 9425958]
